# Experience, not time, determines representational drift in the hippocampus

Dorgham Khatib<sup>1</sup>, Aviv Ratzon<sup>1</sup>, Mariell Sellevoll<sup>1</sup>, Omri Barak<sup>1</sup>, Genela Morris<sup>\*1,2,ζ</sup>, Dori Derdikman<sup>1,ζ\*</sup>

## Affiliations:

<sup>1</sup>*Department of Neuroscience, The Rappaport Faculty of Medicine and Research Institute, Technion-Israel Institute of Technology, Haifa 32000, Israel*

<sup>2</sup>*Tel-Aviv Medical Center, Tel Aviv, Israel*

<sup>ζ</sup>*These authors contributed equally to this work*

\*Corresponding authors. Emails: [derdik@technion.ac.il](mailto:derdik@technion.ac.il) (DD), [genelam.morris@tlvmc.gov.il](mailto:genelam.morris@tlvmc.gov.il) (GM).

## Highlights:

- Representational drift is related to experience within an environment.
- Representational drift is a dynamic context-wide process.
- Place cell number decreases with experience, spatial information content increases.

## Keywords:

hippocampus, representational drift, one-photon Ca<sup>2+</sup> imaging, place cells, reconsolidation, remapping, CA1

## Acknowledgements:

We thank Yaniv Ziv for reading and commenting on the manuscript. This research was supported by the ISRAEL SCIENCE FOUNDATION (grants Nos. 2655/18 and 2183/21 to DD, and 1442/21 to OB), by the German-Israeli Foundation (GIF I-1477-421.13/2018) to DD, by a grant from the US-Israel Binational Science Foundation (NIMH-BSF CRCNS BSF:2019807,

NIMH:R01 MH125544-01 to DD), by an HFSP research grant (RGP0017/2021) to OB, A Rappaport Institute Collaborative research grant to DD, by Israel PBC-VATAT and by the Technion Center for Machine Learning and Intelligent Systems (MLIS) to DD and OB, by the Prince Center for the Aging Brain, and by a University of Michigan – Israel Partnership for Research and Education Collaborative Research stipend to DK.

## 2 **Summary**

3 Memories of past events can be recalled long after the event, indicating stability. But new  
4 experiences are also integrated into existing memories, indicating plasticity. In the hippocampus,  
5 spatial representations are known to remain stable, but have also been shown to drift over long  
6 periods of time. We hypothesized that experience, more than the passage of time, is the driving  
7 force behind memory plasticity. We compared the stability of place cells in the hippocampus of  
8 mice traversing two similar, familiar tracks for different durations. We found that the more time  
9 spent in an environment, the greater the representational drift, regardless of the total elapsed time.  
10 Our results suggest that spatial representation is a dynamic process, related to the ongoing  
11 experiences within a specific context, and is related to the accumulation of new memories rather  
12 than to passive forgetting.

13

## 14 **INTRODUCTION**

15 Place cells in the hippocampus<sup>1-3</sup> are thought to be involved in the representation of episodic  
16 memories<sup>4,5</sup>. When recalling a memory that involves the hippocampus, the memory is reinstated  
17 in the pattern of cell activity in the CA1, according to the synaptic strengths at the moment of  
18 encoding<sup>6,7</sup>. To represent such memories, place cells must be both stable enough to hold the core  
19 memory<sup>8</sup>, yet dynamic enough to allow the introduction of changes to the memory, thus enabling  
20 memory updating<sup>9</sup>.

21 Indeed, the representation of place cells in the hippocampus has been shown to gradually change  
22 over time, within the same context. Referred to as gradual remapping<sup>8,10,11</sup>, and also as  
23 representational drift, this process occurs over a period of hours to days, of repeated exposures to  
24 the same environment<sup>12-15</sup>, although it has been shown that context representation may be  
25 preserved<sup>16</sup>. Two mechanisms could potentially contribute to representational drift. One  
26 mechanism is time dependent, whereby the passage of time weakens memories, leading to partial  
27 forgetting of the original representation. The second mechanism involves context updating, by  
28 which memories that are more malleable to change, due to the specific context and the amount of  
29 experience accumulated within them, are continuously updated. The question arises as to whether  
30 the malleability of memories is more affected by their relative use, or rather by the absolute passage  
31 of time.

32 To address this question, we used a behavioral paradigm that dissociates time and experience. A  
33 mouse traversed two familiar connected environments in the same imaging session. The mouse  
34 visited one of the environments for only short periods at the beginning and at the end of the session,  
35 while spending the remaining hours of the session in the other environment. Thus, the absolute  
36 time interval between the first and last recording in each environment was identical, while the time  
37 spent in each environment differed by an order of magnitude. We found that spatial representations  
38 in the hippocampus changed differently in the two environments, such that the rate of change  
39 depended on the level of use: the longer a memory in a certain context was active, the more  
40 malleable it was to change.

41

## 42 RESULTS

### 43 Context-dependent change of representation is a function of accumulated experience in CA1

44 We set out to distinguish between the effects of passage of time and experience in a context, on  
45 the representational drift in the hippocampus. Thus, we designed a U-Shaped Maze consisting of  
46 two linear tracks of similar length, connected by an intermediate chamber with two doors that open  
47 to either track (Figure 1A). Mice were trained to traverse both tracks, running back and forth, and  
48 collecting food rewards at both ends of the track. The habituation period was 4-6 days; on each  
49 day the animals ran 20 minutes in each arm of the maze until they were consistently able to run  
50 back and forth to collect the food rewards.

51 We performed  $\text{Ca}^{2+}$  imaging of neuronal activity in the dorsal CA1 (dCA1) in freely moving mice  
52 using a one-photon miniature microscope and a micro-endoscope probe (*mean*  $\pm$  *SD*:  $456 \pm 146$   
53 cells per session) (Figure 1B). On the day of the experiment, the mice were first placed inside the  
54 intermediate chamber. Subsequently, they were released into track A, where they spent 10 minutes,  
55 while their neuronal activity was imaged ( $A_0$ ). We then opened the doors into track B, which the  
56 mice traversed for 200 minutes. The activity of cells in track B was imaged for the first 10 minutes  
57 only ( $B_{10}$ ). Subsequently, the mice returned to track A through the intermediate chamber for 10  
58 additional minutes of imaging ( $A_{200}$ ), and finally to track B where the cells were imaged for an  
59 additional 10 minutes ( $B_{210}$ ). This yielded a total of four 10-minute recordings (Figure 1C). The  
60 experimental design ensured that the absolute time that had passed between  $A_0$  and  $A_{200}$  was  
61 identical to the absolute time passed between  $B_{10}$  and  $B_{210}$ .



62 Visually comparing activity (Figure 1D, E) across recordings indicated greater resemblance in the  
63 spatial maps of track A ( $A_0$  and  $A_{200}$ ) than of track B ( $B_{10}$  and  $B_{210}$ ) (Figure 1F, Supplementary  
64 figure 1A). To quantify changes over time in the representations in tracks A and B, we calculated  
65 the correlations between the population rate maps in each pair of recordings (Figure 1G,  
66 Supplementary figure 1B). To obtain a baseline correlation value, within a recording period, we  
67 divided each 10-minute period into two five-minute periods and correlated these with each other.  
68 We found a significantly lower correlation between the maps in the  $B_{10}$  and  $B_{210}$  recordings than  
69 in the maps of the  $A_0$  and  $A_{200}$  recordings (Figure 1H, Supplementary figure 1C). To quantify the  
70 extent of representational drift, we calculated the positional shift of the center of mass of each  
71 place field, between the first and last recordings in each track. This yielded a significant increase  
72 in positional shift of place cells in track B, compared to track A (Figure 1I, Supplementary figure  
73 1D). Overall, these results indicate greater change in representation of a context while the animal  
74 is in that context, relative to when it is not.

75

#### 76 **Representational drift is a gradual process**

77 To investigate the dynamics of the representational drift observed in track B, we repeated the  
78 behavioral protocol described above, while introducing repetitive recordings. Specifically, we  
79 performed 10-minute recordings every 50 minutes in track B, resulting in a total of five recordings  
80 ( $B_{10}$ ,  $B_{70}$ ,  $B_{130}$ ,  $B_{190}$  and  $B_{210}$ ), and two recordings in track A ( $A_0$  and  $A_{200}$ ) (Figure 2A). Rate maps  
81 of place cells underwent gradual change, from  $B_{10}$  to  $B_{210}$  (Figure 2B). This was also reflected in  
82 a gradual decrease in inter-map correlations as a function of the time interval between these maps  
83 (Figure 2C, D, Supplementary figure 2A, B). In this experiment, we reproduced the initial finding,  
84 namely, higher correlations between the first and last recordings in track A compared to the first  
85 and last recordings in track B (Figure 2E, Supplementary figure 2C). The positional shift increased  
86 as the correlations decreased (Figure 2F, G, Supplementary figure 2D).

87

#### 88 **Representational drift is a context-wide process**

89 We were interested in further investigating the extent of the context-related representational drift  
90 and whether it is related to specific sub-contexts within the bigger one. To check this, we needed  
91 a more variable behavior and a different occupancy time than is possible in a linear track. Thus,  
92 we repeated the experiment in two rectangular arenas connected by a door (Figure 3A). We used

93 the same extended experimental protocol as before (Figure 2A). We recorded the activity in dCA1  
94 in the two dimensional (2D) shaped arenas (Figure 3B), and we observed a similar effect. The  
95 correlations of rate maps were significantly greater for place cells in context A than for place cells  
96 in context B, albeit with a smaller effect size than in the linear track (Figure 3C, D).  
97 Our results thus far indicate a role of experience within a specific context, in accelerating  
98 representational drift. We sought to examine whether this was also true for sub-regions. To  
99 examine this, we divided the 2D arena in arena B to two virtual halves and checked the  
100 representational drift in each half. For this analysis, we focused on the subset of neurons whose  
101 maximum firing field was initially in each sub-region (see the example in Figure 3E). We noticed  
102 that in many instances the reduction in correlation was not related to the time spent in each sub-  
103 region (e.g. Figure 3F for mouse 9819). We grouped the neurons by each mouse's preferred sub-  
104 region, i.e. the region in which it spent more time, and measured the correlations between the rate  
105 maps of these neurons, for each pair of recordings. No significant dependence was found between  
106 the time spent in a sub-region and the reduction in correlation (Figure 3G). There was even a slight  
107 non-significant tendency for an increase in correlation when the time spent in a sub-region  
108 increased (Figure 3H). Note that in the specific experimental setting, this analysis cannot be  
109 reliably done in a linear track, as the mice tended to spend an equal amount of time throughout  
110 such a track. In the 2D arena, each mouse had a preferred sub-region where it spent more time,  
111 thus enabling testing the hypothesis. In summary, representational drift appears to occur as a single  
112 entity in the entire context, unrelated to the occupancy time within sub-regions of the context.

113

### 114 **Spatial information content of place cells increases while the number of place cells decreases,** 115 **as more time is spent in an environment**

116 To understand how representational drift affects the spatial encoding of the environment, we  
117 measured parameters of spatial information and encoding. We examined the spatial information  
118 content of place cells in each of the recordings. Spatial information of place cells increased with  
119 the time spent in the environment (Figure 4A left). The increase in spatial information was  
120 significantly higher in track B than track A (Figure 4A right). To investigate the cause of the  
121 increased spatial information content of the place cells, we examined the out-of-field event rate,  
122 the maximum bin event rate, and the field size over the course of the experiment. Both the out-of-  
123 field event rate and the field size decreased as the experiment progressed (Supplementary figure

124 3A, B), while the maximum bin rate did not change significantly (Supplementary figure 3C). For  
125 a given recording, we observed a decrease in the proportion of place cells of the population of  
126 active cells, as more time was spent in the environment (Figure 4B left). The proportion of active  
127 place cells in B<sub>210</sub> was significantly lower than that of A<sub>200</sub> (Figure 4B right). This reduction in the  
128 proportion of place cells was not accompanied by a concordant reduction in the overall number of  
129 active cells in each imaging recording (Figure 4C). The increase in spatial information content of  
130 place cells was correlated with the decrease in the proportion of place cells (Figure 4D). This  
131 suggests that the encoding power did not change, despite the decrease in the number of active place  
132 cells. To examine the combined effect of the changes in spatial information and the proportion of  
133 place cells, on the population encoding of space, we trained a maximum likelihood estimator  
134 (MLE) for decoding and cross-decoding the neural activity (see the methods for more details). We  
135 observed a slight insignificant increase (A<sub>0</sub> - A<sub>200</sub>: 0.74 cm; B<sub>10</sub> - B<sub>210</sub>: 3.66 cm) in the decoding  
136 error, throughout the experiment (Figure 4E). This suggests that the population of place cells  
137 retained its capacity to encode spatial information, despite the substantial reduction in the number  
138 of cells. To further assess the effect of the representational drift, we performed a cross-decoding  
139 analysis of the place cell population, between recordings (see methods). This revealed more  
140 accurate cross-recording decoding in track A than track B (Figure 4F). Taken together, these results  
141 suggest that the efficiency of hippocampal representation increases with experience, without  
142 compromising its accuracy.

143

## 144 **DISCUSSION**

145 We examined the stability over a number of hours, of spatial representations in the hippocampus,  
146 in mice traversing two familiar environments in which they spent substantially different amounts  
147 of time. We found that the representations of a track in which the mouse spent relatively little time  
148 (20 min. in total, in two visits) were highly correlated between the visits, three hours apart. In  
149 contrast, the representations of a track in which the mouse spent a much longer time (about 3  
150 hours), were significantly less correlated between two recordings, three hours apart. This indicates  
151 more malleability to change with longer time spent in an environment, even an environment  
152 without any noticeable physical difference from a previously experienced one or from the  
153 surrounding area.

154

## 155 **Representational drift depends on accumulated experience**

156 Previous studies reported gradual decreases in spatial correlations, with repeated exposures to the  
157 same environment<sup>12,14</sup>, over a period of days. In our study we observed a comparable decrease in  
158 correlation, but over a period of three hours rather than days. We attribute the steeper decrease in  
159 correlations seen in our study to the long time spent in the track. However, while the largest change  
160 in representation was in track B, where the mouse spent most of its time, we also observed a change  
161 in representation in track A, though it was visited for only short periods. This representational drift  
162 may reflect the previously suggested continuous sparsification of the representation, even in the  
163 absence of active use, as the brain's way of compressing experiences, thereby achieving greater  
164 efficiency by using less resources<sup>17,18</sup>. The lesser change in representation in track A could also be  
165 due to context generalization, as the two tracks were interconnected<sup>19</sup>.

166 The correlations of the spatial representations gradually decreased as the time spent in a given  
167 track increased. This suggests a constant representational drift of the place cell population, as has  
168 been shown in consecutive re-exposures to the same environment<sup>13,14</sup>. Moreover, in a similar  
169 recording task in a rectangular arena, we found that the decrease in correlation in each half of the  
170 arena did not depend on the time spent there. This suggests that the rate of representational drift  
171 was related to accumulated experience in the context, rather than to the specific locations within  
172 it.

173

## 174 **A decrease in active place cells is accompanied by an increase in spatial information**

175 Previous studies reported that spatial information content increased with repeated exposures to the  
176 same environment<sup>20,21</sup>. In our experiment, this effect was also mediated by the time spent in a  
177 familiar environment. The increase in spatial information per cell was accompanied by a decrease  
178 in the number of overall active place cells. Thus, as time progressed in a specific context, fewer  
179 place cells were in use, but their individual information content was higher. We suggest that this  
180 increases the efficiency of representations, as more experience is accumulated within an  
181 environment, thus reducing the resources needed as the network becomes more tuned.

182 To test this efficiency hypothesis, we used a maximum-likelihood decoder to decode the animals'  
183 position at each time point. We found that the decoding quality did not substantially degrade  
184 between the start and the end of the experiment, suggesting that the increase in spatial information  
185 per cell compensated for the decrease in the number of place cells. This hints to the possibility that

186 the hippocampus balances the amount of spatial information within its network by decreasing the  
187 number of place cells with accumulated experience, while increasing the spatial information per  
188 cell, such that the total information does not change much, but the load on the network is  
189 reduced<sup>21,22</sup>.

190 In summary, our results indicate that even in the absence of perceived change, memory of a given  
191 environment is constantly updated, thereby inducing a continuous representational drift that is  
192 dependent on the amount of time spent in that environment. This resonates well with the  
193 phenomenon of lability to change after activation, known as reconsolidation<sup>23</sup>. The notion that  
194 hippocampal memory may be subject to change, when active, indicates a tight link between  
195 activity within context, and plasticity of hippocampal representations.

196  
197

## 198 [STAR methods](#)

199 Contact for Reagent and Resource Sharing: Further information and requests for resources,  
200 reagents and Matlab code should be directed to and will be fulfilled by the Lead Contact.

201

## 202 [METHODS](#)

### 203 [Mice and surgical procedures](#)

204 All the surgical and experimental procedures were approved by the Animal Care and Use  
205 Committee of the Technion – Israel Institute of Technology. All the mice were from the same  
206 C57BL/6 background from Jackson Laboratories. The mice were aged 8-12 weeks at the start of  
207 the procedures. They were housed separately and underwent two surgical procedures under  
208 isoflurane anesthesia (1.5-2% volume) accompanied by buprenorphine analgesia (0.7 mL of 1:60  
209 saline-diluted 30 mg/ml buprenorphine).

210 The mice were injected with the viral vector AAV1-syn-jGCaMP7f-WPRE (~1<sup>13</sup> vg/mL,  
211 Addgene) into the dCA1 (stereotactic coordinates: -2.1 mm anteroposterior, 1.25 mm mediolateral,  
212 -1.4 mm dorsoventral from bregma) of the hippocampus using a pulled glass micropipette. These  
213 injections were 250-300 nL in volume, at a rate of 0.05 µl a minute. Two weeks after the injections,  
214 the mice underwent a second surgery. A craniotomy (1mm in diameter) was performed in the same  
215 coordinates as the GCaMP injection. We removed the dura and cortex above the CA1 by suction  
216 with a 29-gauge blunt needle while constantly washing the exposed tissue with sterile PBS. Then

217 we implanted a GRIN lens (ProView™ Lens Probes 1.0mm diameter, ~4.0mm length, Inscopix,  
218 Palo Alto, CA) directly above the CA1, and sealed the space between the skull and the lens with  
219 kwik-sill (WPI, Sarasota, FL). Afterwards, we used Metabond (Parkell, Edgewood, NY) to cover  
220 the exposed skull and the lateral sides of the lens. Two weeks after, a baseplate (Inscopix) was  
221 installed above the lens. This was done by lowering the miniature microscope (Inscopix) until it  
222 reached an in-focus imaging plane, after which the baseplate was attached to the Metabond  
223 (Parkell) covered skull using light-cured dental cement.

224

### 225 **Food restriction, training, and reward habituation**

226 After at least one-week recovery following the implantation surgery, the animals were food  
227 restricted to 2.5-3 g of food pellets (Altromin 1324 IRR complete animal feed for laboratory  
228 animals) to maintain 85%-90% of their original body weight. The mice were trained to run back  
229 and forth in the linear track, receiving small banana-flavored food pellet rewards at both ends of  
230 the track. This was done for 3-5 days prior to the experiment to familiarize the animals with the  
231 track and to obtain good coverage during the experiments. Training was finished when the animals  
232 could do at least 10 runs back and forth (20 meters) in 10 minutes while eating all the food rewards  
233 offered. After completing the training, the animals were ready for the experimental phase.

234

### 235 **Experimental setup**

236 The experimental setup consisted of a custom-made maze composed of two linear tracks  
237 measuring 100 cm in length, 10 cm in width, and 10 cm in height. The tracks were painted black  
238 and suspended 40 cm above the ground using a small table. We used overhead lights to illuminate  
239 the track, and black curtains surrounded the track from all sides. At the beginning of each  
240 experiment, the animals were first connected to the miniature microscope (Inscopix) in the home  
241 cage while we made sure to return to the same field of view before the start of the imaging  
242 recording. Mice were placed inside the intermediate chamber, and then released into track A where  
243 they spent 10 minutes, while the activity of their cells were imaged ( $A_0$ ). We then opened the doors  
244 to track B, which the mice traversed for 200 minutes. The activity of cells in track B was imaged  
245 for the first 10 minutes only ( $B_{10}$ ). After 200 minutes, the mice returned to track A through the  
246 intermediate chamber, for 10 additional minutes of imaging ( $A_{200}$ ), and finally to track B, where  
247 the cells were imaged for an additional 10 minutes ( $B_{210}$ ), resulting in a total of four 10-minute

248 recordings (Figure 1B). The linear track surface was cleaned after each session with 70% ethanol.  
249 For the 2D experiments, the same behavioral protocol described above was repeated, only in a  
250 different maze. This maze consisted of two similar rectangular arenas connected by a door (Figure  
251 3A).

252

### 253 **Ca<sup>2+</sup> imaging and processing of the data**

254 We imaged the calcium signal using a miniature microscope (nVista, Inscopix) at 20 Hz.  
255 Recordings were synchronized with the behavioral camera mounted above the track. We processed  
256 the imaging data using the Inscopix data processing software (IDPS) (1.3.1) and custom written  
257 MATLAB codes. To ascertain similar processing for all recording epochs, analysis of imaging  
258 data was combined for all recording epochs of the same experiment. For processing the imaging  
259 data, we followed previously described routines<sup>13</sup>. Specifically, we spatially downsampled the  
260 videos in each dimension. Then we applied a 3x3 median filter to fix any defective pixels due to  
261 unequal illumination or defects in the sensor itself. Subsequently, a spatial bandpass filter was  
262 applied using the IDPS (low cut-off: 0.005, high cut-off: 0.5 *pixel*<sup>-1</sup>) to achieve a smoothed  
263 version of the original video. This enhanced the appearance of the blood vessels and was later used  
264 to make the motion correction more effective. We then applied a motion correction algorithm using  
265 IDPS (correction type: translation and rotation; reference region with maximum registration value  
266 ( $r = 20$  pixels)). For calcium signal extraction from putative single CA1 neurons, we used the  
267 constrained non-negative matrix factorization – extended algorithm (CNMF-E) using  
268 MATLAB<sup>24,25</sup>. The algorithm isolated the putative single units from the processed imaging videos  
269 automatically. Isolated putative units that did not match spatial or temporal features of the neurons  
270 were discarded and not used in subsequent analyses. All the analyses used the deconvolved activity  
271 inferred by CNMF-E.

272

### 273 **Place fields**

274 We computed spatial firing rates (rate maps) by dividing the one-dimensional track to 25 spatial  
275 bins (4 cm/bin). We divided the neural and behavioral data by conducting direction runs to the left  
276 and to the right. Events that occurred and position information that accumulated during non-  
277 movement epochs (< 1 cm/sec) were excluded. We also excluded the last bins at the two ends of  
278 the tracks, where the mice were generally stationary due to consumption of food rewards. We then



279 divided the number of events in each spatial bin by the amount of time the mouse spent in that bin  
280 per direction. We used a Gaussian smoothing factor ( $\sigma = 3$  cm) for each bin and normalized  
281 each place field by its maximum value. Unvisited spatial bins were marked for exclusion in later  
282 analyses. Place fields with less than five events ( $\text{Ca}^{2+}$  imaging) were excluded from the analysis.  
283 For place cells included in the analysis, we calculated the spatial information (SI, bits/event) for  
284 each cell, as previously described:

$$285 \quad SI = \sum_i p_i (r_i/\bar{r}) \log_2(r_i/\bar{r})$$

286 Where  $r_i$  is the rate of the neuron in the  $i$ th bin;  $p_i$  is the probability of the mouse being in the  $i$ th  
287 bin (time spent in the  $i$ -th bin/total session time);  $\bar{r}$  is the overall mean rate; and  $i$  indicates running  
288 over all the bins. We then performed a temporal shuffling procedure for each rate map, to test for  
289 statistical significance of spatial information. Event timestamps were moved in a random non-  
290 repeating circular shift relative to the position time in each trial, 1000 times for each cell. We  
291 computed rate maps and spatial information for every iteration. A cell was considered as spatially  
292 modulated during a trial if its spatial information score was higher than 950 of the shuffled data  
293 instances of spatial information, for a significance level of  $p < 0.05$ .

294

### 295 **Single-cell correlation**

296 We calculated the correlation between the activity of each two corresponding neurons in a  
297 particular imaging recording, using the rate maps of these neurons. We calculated the Spearman's  
298 correlation between the maps for each two neurons. Then we batched all the cell-pair correlations  
299 of all the mice from the same sessions together.

300

### 301 **Positional shift**

302 For each neuron, we calculated the positional shift as the absolute difference between the positions  
303 of the peak event rate (Gaussian smoothing factor  $\sigma = 3$  cm) on the track in two recordings.  
304 Then we averaged all the positional shifts for the neurons of all the mice in the same sessions.

305

### 306 **Decoding position from activity**

307 To decode the position of the mouse from the neural activity, we used a maximum likelihood  
308 estimation (MLE) decoder. We assumed that neural events were uncorrelated, which is practically  
309 untrue and diminishes decoding accuracy but greatly simplifies calculation time. In addition,



310 because events are so sparse that most time bins are either empty of activity or contain only one  
311 event, we used a maximum filter ( $size = 250[ms]$ ) over each neuron's activity vector. The  
312 likelihood function can then be written as:

$$313 \quad L(y_t; x_t) = \prod_{i=1}^N P(x_t^i; y)$$

314 Where  $x_t^i$  is a binary variable that represents whether neuron  $i$  fired at time  $t$ ,  $N$  is the number of  
315 place cells used for the decoding,  $P(x_t^i; y)$  is the  $y$  bin of the  $i_{th}$  neuron normalized unsmoothed  
316 rate map if the neuron fired, and the inverse normalized rate map if it did not fire. The position can  
317 then be decoded using maximum likelihood.

$$318 \quad \hat{y}_t = \underset{y}{\operatorname{argmax}} \prod_{i=1}^N P(x_t^i|y)$$

319 Because the probabilities are very small, we used the following adjusted formula to avoid  
320 numerical errors; and as the transformation is monotonous, the decoding is not changed:

$$321 \quad \hat{y}_t = \underset{y}{\operatorname{argmax}} \exp\left(\sum_{i=1}^N \log(1 + P(x_t^i|y)) - 1\right)$$

322  
323 To test the decoder's error, we split the recording data such that the rate maps were estimated based  
324 on 75% of the linear track traversals (in each direction) and the MSE was calculated over the  
325 remaining 25%. For the cross decoder, we calculated the rate maps based on the first recording  
326 and the error over the second recording.

327 **References**

328

- 329 1. O'Keefe J, Dostrovsky J. The hippocampus as a spatial map. Preliminary evidence from  
330 unit activity in the freely-moving rat. *Brain Res.* 1971;34(1):171-175. doi:10.1016/0006-  
331 8993(71)90358-1
- 332 2. O'Keefe J, Nadel L. The Hippocampus as a Cognitive Map. *Oxford Univ Press Oxford,*  
333 *UK.* 1978.
- 334 3. Muller RU, Kubie JL, Ranck JB. Spatial firing patterns of hippocampal complex-spike  
335 cells in a fixed environment. *J Neurosci.* 1987;7(7):1935-1950.  
336 doi:10.1523/JNEUROSCI.07-07-01935.1987
- 337 4. Tulving E. Episodic and Semantic Memory. 1972.
- 338 5. Eichenbaum H. Hippocampus: Cognitive Processes and Neural Representations that  
339 Underlie Declarative Memory. *Neuron.* 2004;44(1):109-120.  
340 doi:10.1016/J.NEURON.2004.08.028
- 341 6. Kitamura T, Ogawa SK, Roy DS, et al. Engrams and circuits crucial for systems  
342 consolidation of a memory. *Science (80- ).* 2017;356(6333):73-78.  
343 doi:10.1126/SCIENCE.AAM6808
- 344 7. Liu X, Ramirez S, Pang PT, et al. Optogenetic stimulation of a hippocampal engram  
345 activates fear memory recall. *Nat 2012 4847394.* 2012;484(7394):381-385.  
346 doi:10.1038/nature11028
- 347 8. Alme CB, Miao C, Jezek K, Treves A, Moser EI, Moser M-B. Place cells in the  
348 hippocampus: Eleven maps for eleven rooms. *Proc Natl Acad Sci.* 2014;111(52):18428-  
349 18435. doi:10.1073/pnas.1421056111
- 350 9. Manns JR, Howard MW, Eichenbaum H. Gradual Changes in Hippocampal Activity  
351 Support Remembering the Order of Events. *Neuron.* 2007;56(3):530-540.  
352 doi:10.1016/J.NEURON.2007.08.017
- 353 10. Muller RU, Kubie JL. The effects of changes in the environment on the spatial firing of  
354 hippocampal complex-spike cells. *J Neurosci.* 1987;7(7):1951-1968.  
355 doi:10.1523/jneurosci.07-07-01951.1987
- 356 11. Leutgeb JK, Leutgeb S, Treves A, et al. Progressive Transformation of Hippocampal  
357 Neuronal Representations in "Morphed" Environments. *Neuron.* 2005;48(2):345-358.

- 358 doi:10.1016/J.NEURON.2005.09.007
- 359 12. Sheintuch L, Rubin A, Brande-Eilat N, et al. Tracking the Same Neurons across Multiple  
360 Days in Ca<sup>2+</sup> Imaging Data. *Cell Rep.* 2017;21(4):1102-1115.  
361 doi:10.1016/j.celrep.2017.10.013
- 362 13. Ziv Y, Burns LD, Cocker ED, et al. Long-term dynamics of CA1 hippocampal place  
363 codes. *Nat Neurosci.* 2013;16(3):264-266. doi:10.1038/nn.3329
- 364 14. Mankin EA, Sparks FT, Slayyeh B, Sutherland RJ, Leutgeb S, Leutgeb JK. Neuronal code  
365 for extended time in the hippocampus. *Proc Natl Acad Sci U S A.* 2012;109(47):19462-  
366 19467. doi:10.1073/PNAS.1214107109
- 367 15. Rule ME, O’Leary T, Harvey CD. Causes and consequences of representational drift.  
368 *Curr Opin Neurobiol.* 2019;58:141-147. doi:10.1016/j.conb.2019.08.005
- 369 16. Keinath AT, Mosser CA, Brandon MP. The representation of context in mouse  
370 hippocampus is preserved despite neural drift. *Nat Commun.* 2022;13(1):1-11.  
371 doi:10.1038/s41467-022-30198-7
- 372 17. Gluck MA, Myers CE. Hippocampal mediation of stimulus representation: A  
373 computational theory. *Hippocampus.* 1993;3(4):491-516. doi:10.1002/HIPO.450030410
- 374 18. Benna MK, Fusi S, Kavli D. Place cells may simply be memory cells: Memory  
375 compression leads to spatial tuning and history dependence.  
376 doi:10.1073/pnas.2018422118
- 377 19. Cai DJ, Aharoni D, Shuman T, et al. A shared neural ensemble links distinct contextual  
378 memories encoded close in time. *Nat* 2016 5347605. 2016;534(7605):115-118.  
379 doi:10.1038/nature17955
- 380 20. Cacucci F, Wills TJ, Lever C, Giese KP, O’Keefe J. Experience-Dependent Increase in  
381 CA1 Place Cell Spatial Information, But Not Spatial Reproducibility, Is Dependent on the  
382 Autophosphorylation of the  $\alpha$ -Isoform of the Calcium/Calmodulin-Dependent Protein  
383 Kinase II. *J Neurosci.* 2007;27(29):7854-7859. doi:10.1523/JNEUROSCI.1704-07.2007
- 384 21. Karlsson MP, Frank LM. Network Dynamics Underlying the Formation of Sparse,  
385 Informative Representations in the Hippocampus. *J Neurosci.* 2008;28(52):14271-14281.  
386 doi:10.1523/JNEUROSCI.4261-08.2008
- 387 22. Dabaghian Y, Mémoli F, Frank L, Carlsson G. A Topological Paradigm for Hippocampal  
388 Spatial Map Formation Using Persistent Homology. *PLOS Comput Biol.*

- 389           2012;8(8):e1002581. doi:10.1371/JOURNAL.PCBI.1002581
- 390   23.   Nader K. Memory traces unbound. *Trends Neurosci.* 2003;26(2):65-72.
- 391           doi:10.1016/S0166-2236(02)00042-5
- 392   24.   Zhou P, Resendez SL, Rodriguez-Romaguera J, et al. Efficient and accurate extraction of
- 393           in vivo calcium signals from microendoscopic video data. *Elife.* 2018;7.
- 394           doi:10.7554/eLife.28728
- 395   25.   Pnevmatikakis EA, Soudry D, Gao Y, et al. Simultaneous Denoising, Deconvolution, and
- 396           Demixing of Calcium Imaging Data. *Neuron.* 2016;89(2):285.
- 397           doi:10.1016/j.neuron.2015.11.037
- 398

399 **Main figure titles and legends**

400

401 **Figure 1**

402 Context dependent change of representation as a function of the relative time in the dorsal CA1.

403 A. Left: Illustration of the maze, composed of two linear tracks, A and B, connected by an  
404 intermediate chamber. Right: Illustration of the injection site and viral vector used, together  
405 with the lens implantation.

406 B. Example of an imaging field of view.

407 C. The timeline of the experiment. The colors correspond to the different recordings; grey color  
408 indicates experiment time without imaging.

409 D. Three examples of place cell calcium traces in all the recordings.

410 E. Examples of three place cells, showing the firing rate of the cells as a function of position in  
411 the track (right) and the  $\text{Ca}^{2+}$  events (left) along the different recordings (color code as in B).

412 F. Place cell population in all the recordings for mouse 9855. In each row are shown average rate  
413 maps for individual cells along the linear track, during left or right traversals of place cells that  
414 were active in that specific period, normalized by peak activity. In the  $n^{\text{th}}$  row, place cells were  
415 selected and sorted according to the  $n^{\text{th}}$  imaging session. Note that each column displays data  
416 from the same session. The red and blue rectangles emphasize the comparison between the  
417 first and last sessions in tracks A and B, respectively.

418 G. Pairwise Spearman correlations of the individual place cells shown in “e”, between recordings.

419 H. Pairwise correlations of all the place cells from all the mice ( $n=3$  mice, 1441 cells) as a function  
420 of elapsed time. The 5-minute point was computed by splitting the recordings in half and  
421 correlating the activity of place cells between consecutive halves. The correlations in track B  
422 were lower than in track A (mean $\pm$ s.e.m:  $A_{200}=0.46\pm 0.01$ ;  $B_{210}=0.31\pm 0.01$ ;  $p<0.001$ ,  
423 Kruskal-Wallis with Dunn’s test).

424 I. Left: Positional shift of the center of mass of the place cells of all the mice ( $n=3$ , 1441 cells),  
425 between the first and last recordings in tracks A and B. Right: The overall positional shift of  
426 the center of mass of the place cells, between tracks A and B. Positional shift increased in track  
427 B compared to track A (mean $\pm$ s.e.m:  $A_{200}=22.46\pm 0.76$ ;  $B_{210}=25.77\pm 0.8$ ;  $p<0.001$  Mann-  
428 Whitney U test).

429

430 **Figure 2**

431 Representational drift is a gradual process.

432 A. Timeline of the experiment, the colors correspond to the different recordings, grey color  
433 indicates experiment time with imaging off.

434 B. Examples of two place cells, showing the firing rate of the cells as a function of their positions  
435 in the track (right) and the  $\text{Ca}^{2+}$  event times as a function of position (left), over the course of  
436 the recordings (same colors as in panel a).

437 C. The place cell population in all the imaging sessions for mouse 6065. The maps show average  
438 rate maps for individual cells along the right or left traversals of the linear track of the place  
439 cells that were active during the specific recording, normalized by the peak activity. In the  $n^{\text{th}}$   
440 row, place cells are selected and sorted according to the  $n^{\text{th}}$  recording. Note that each column  
441 displays data from the same recording.

442 D. Average pairwise correlations of individual cells, between imaging sessions for the same  
443 mouse.

444 E. Pairwise correlation of all place cells ( $n=5$  mice, 4280 cells) as a function of elapsed time.  
445 Correlations in track A were higher than in track B (mean $\pm$ s.e.m:  $A_{200}=0.45\pm 0.01$ ;  
446  $B_{210}=0.26\pm 0.008$ ;  $p<0.001$ , Kruskal-Wallis with Dunn's test).

447 F. An example of positional shift of the center of mass of all place cells from the same mouse  
448 shown in "c".

449 G. Positional shift compared between recordings in track A and recordings in track B,  $p<0.001$ ,  
450 Kruskal-Wallis with Dunn's test.

451

452 **Figure 3**

453 Representational drift is a context-wide process.

454 A. Illustration of the maze.

455 B. Two examples of place cells from all the recordings. In each example, top row: rate maps as a  
456 function of position in the track; bottom row: trajectory of the animal (black) and  $\text{Ca}^{2+}$  events  
457 (red).

458 C. Pairwise single-cell correlations between imaging sessions, in both tracks, for mouse 9819.

- 459 D. Pairwise correlation of all the place cells from all the mice (n=3 mice, 1829 cells) as a function  
460 of the time passed. Correlations after 200 min. were lower in track B than track A  
461 (mean±s.e.m:  $A_{200}=0.40\pm 0.01$ ;  $B_{210}=0.35\pm 0.01$ ,  $p<0.001$ ; Kruskal-Wallis with Dunn's test).
- 462 E. Left: Illustration of the division of the arena into halves. Right: Two examples of place cells in  
463 the first and last imaging sessions in track B.
- 464 F. Correlation from the top and bottom halves of the arena, for mouse 9819. The top half slope=-  
465 0.002,  $p=0.019$ ; the bottom half slope=-0.005,  $p=0.026$ , two tailed t-test.
- 466 G. Pairwise correlations of all the place cells from all the mice (n=3 mice, 1676 cells), as a  
467 function of the time passed. The two lines correspond to neurons whose maximal firing rate  
468 occurred in the sub-region where the mouse spent more time (green) and less time (gray). There  
469 was no significant difference between the two halves ( $p=0.075$ , Kruskal-Wallis with Dunn's  
470 test).
- 471 H. Normalized correlations as a function of the normalized time spent in each half of the arena,  
472 for all (n=3) mice. Slope=0.117,  $p=0.081$ , two tailed t-test.

473

#### 474 **Figure 4**

475 As the time spent in an environment increased, the spatial information content of place cells  
476 increased and the number of place cells decreased.

- 477 A. Spatial information content (n=8 mice) divided into runs north and south throughout the  
478 imaging sessions in both contexts. Left: The fitted regression line between spatial information  
479 and the time spent in the context was significant ( $R^2=0.23$ ,  $p<0.001$ ); the spatial information  
480 of place cells increased as the time spent in the context increased ( $\beta=0.08$ ,  $p<0.001$ ). Right:  
481 bar plot of the spatial information content in the first and last recordings in tracks A and B.  
482 The effect of time on spatial information was statistically significant,  $F(1, 34) = 79.29$   $p<0.001$   
483 (two-way repeated measures ANOVA). The spatial information was higher in  $B_{210}$  than in  $B_{10}$   
484 (mean±s.e.m:  $B_{10}=2.09\pm 0.03$ ;  $B_{210}=2.69\pm 0.08$ ;  $p<0.001$ ), and in  $A_{200}$  than in  $A_0$   
485 (mean±s.e.m:  $A_0=2.04\pm 0.05$ ;  $A_{200}=2.29\pm 0.07$ ;  $p=0.004$ ). At the end of the experiment, the  
486 spatial information was higher in track B than track A ( $B_{210} - A_{200}$   $p<0.001$ , T-test with  
487 Bonferroni correction for multiple comparisons).
- 488 B. The proportion of place cells from all the active cells, in the same recording, during all  
489 recordings for both contexts. Left: The fitted regression model between the overall proportion

490 of active place cells and the time spent in the context was significant ( $R^2=0.293$ ,  $p<0.001$ ); the  
491 proportion of active place cells decreased as more time was spent in the context ( $\beta=-0.02$ ,  
492  $p<0.001$ ). Right: The effect of time on the proportion of place cells was statistically significant,  
493  $F(1, 34) = 4.80$   $p=0.035$  (two-way repeated measures ANOVA). The proportion of place cells  
494 active in each session was smaller in  $B_{210}$  than in  $B_{10}$  (mean $\pm$ s.e.m:  $B_{10}=0.23\pm 0.01$ ;  
495  $B_{210}=0.11\pm 0.01$ ;  $p<0.001$ ), and was also smaller in  $A_{200}$  than in  $A_0$  (mean $\pm$ s.e.m:  $A_0$   
496  $=0.26\pm 0.01$ ;  $A_{200}=0.18\pm 0.01$ ;  $p=0.006$ ). The proportion of place cells in  $B_{210}$  was lower than  
497 in  $A_{200}$  ( $p=0.009$ , T-test with Bonferroni correction for multiple comparisons).

498 C. The number of active cells in each session. Left: The regression model for the number of active  
499 cells in each recording was not significant ( $R^2=0.027$ ,  $p=0.108$ ). Right: The number of active  
500 cells did not differ significantly between recordings,  $F(1, 34) = 1.62$   $p=0.212$  (two-way  
501 repeated measures ANOVA).

502 D. The difference in spatial information content between the first and last recordings in both  
503 tracks ( $n= 62$  recordings), normalized by the values of the first recording ( $[SInfo_{last} -$   
504  $SInfo_{first}]/SInfo_{first}$ ), plotted as a function of the normalized difference in the proportions of  
505 place cells between the first and last sessions in each track ( $[%PC_{last} - \%PC_{first}]/\%PC_{first}$ ),  
506  $r=-0.515$ ,  $p<0.001$  (Pearson's correlations).

507 E. Decoding error of the maximum likelihood estimator (MLE) decoder in the imaging sessions.  
508 The decoding error increased moderately as more time was spent in the context ( $R^2=0.09$ ,  
509  $p=0.039$ ), although differences between the groups were not significant (t-test with Bonferroni  
510 correction for multiple comparisons).

511 F. Cross-decoding error of the MLE decoder. The cross-decoding error was smaller in track A  
512 than track B ( $p<0.001$ ; t-test with Bonferroni correction for multiple comparisons).



**Figure 1**

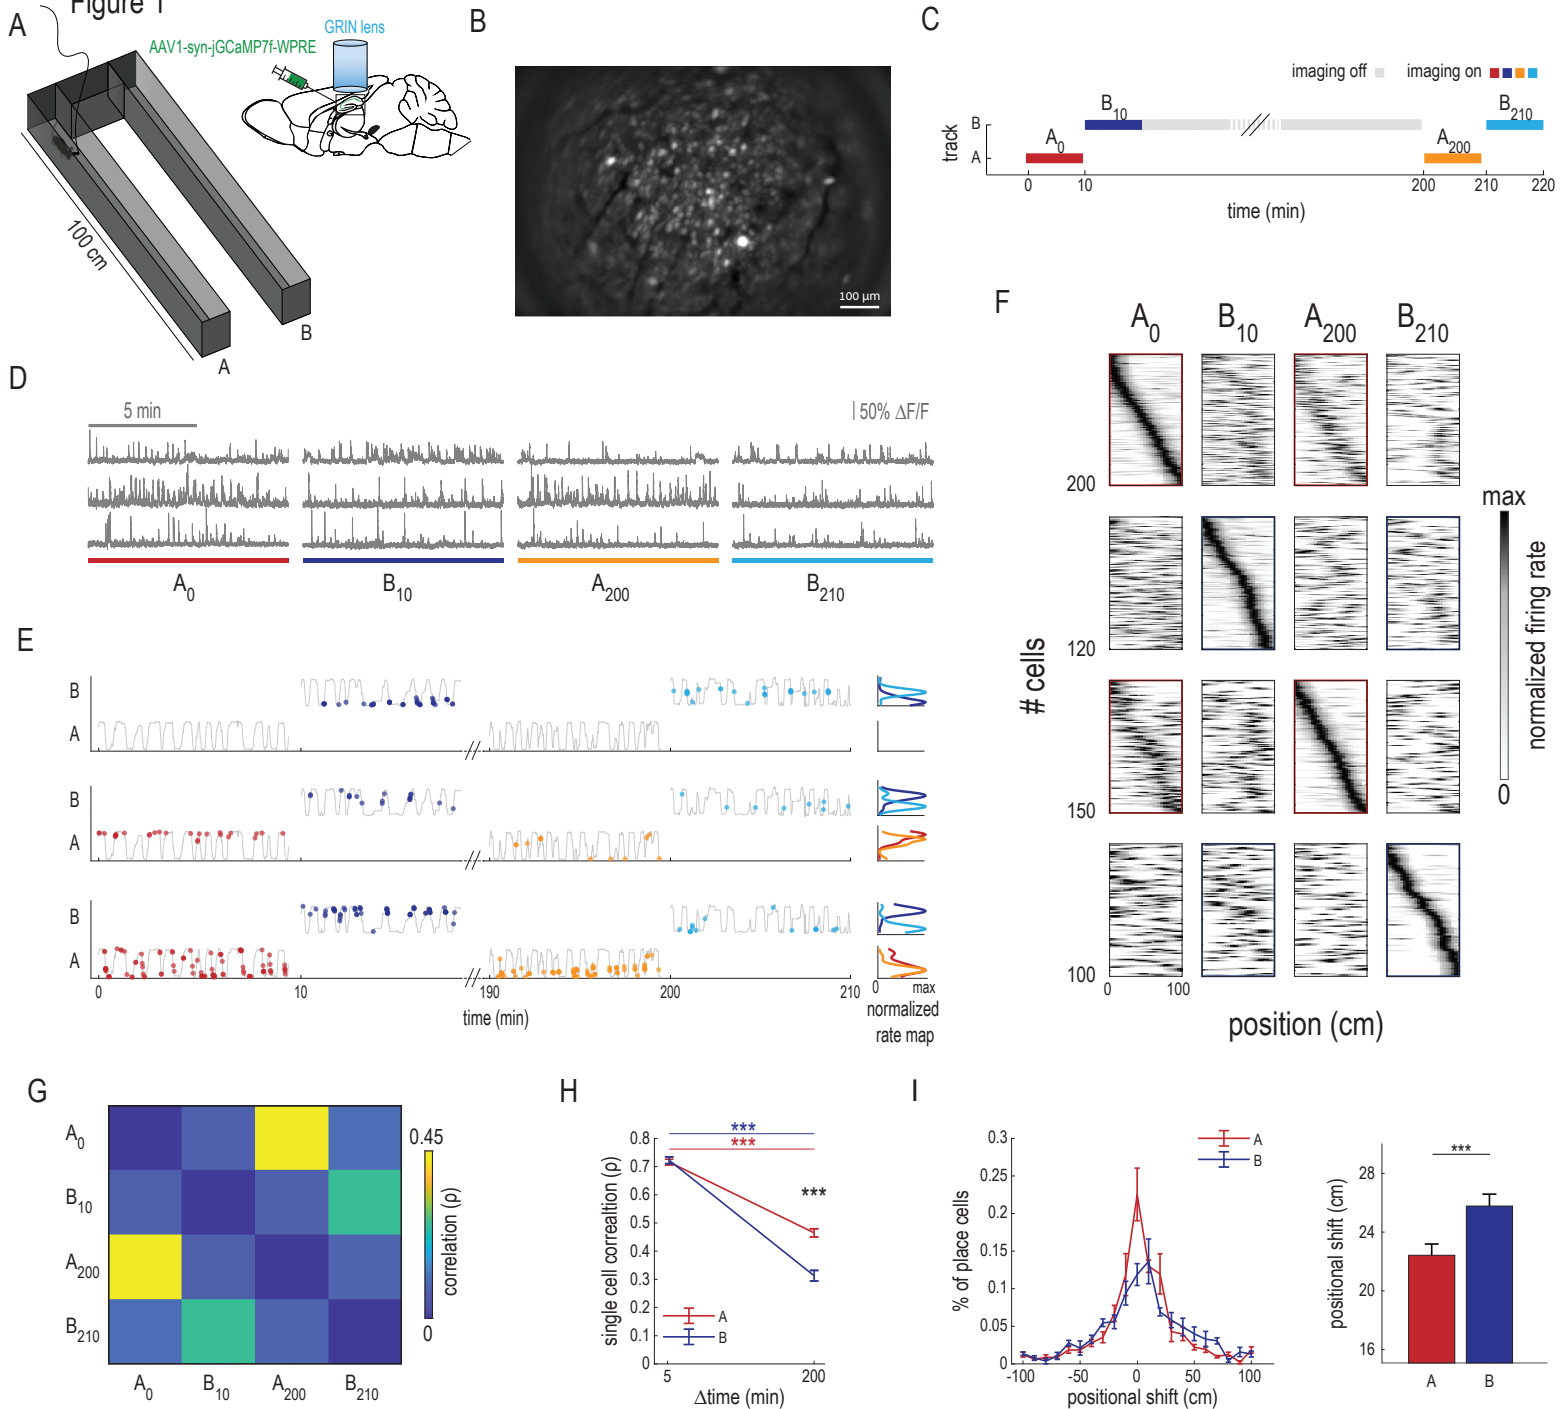

**A Figure 2**

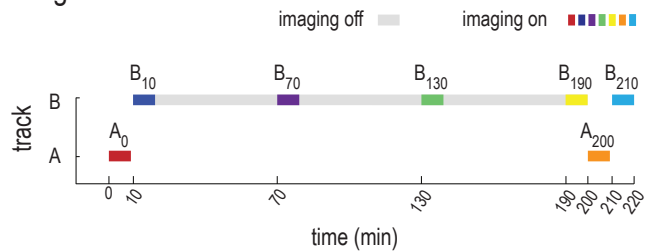

mouse 6056 day 210422

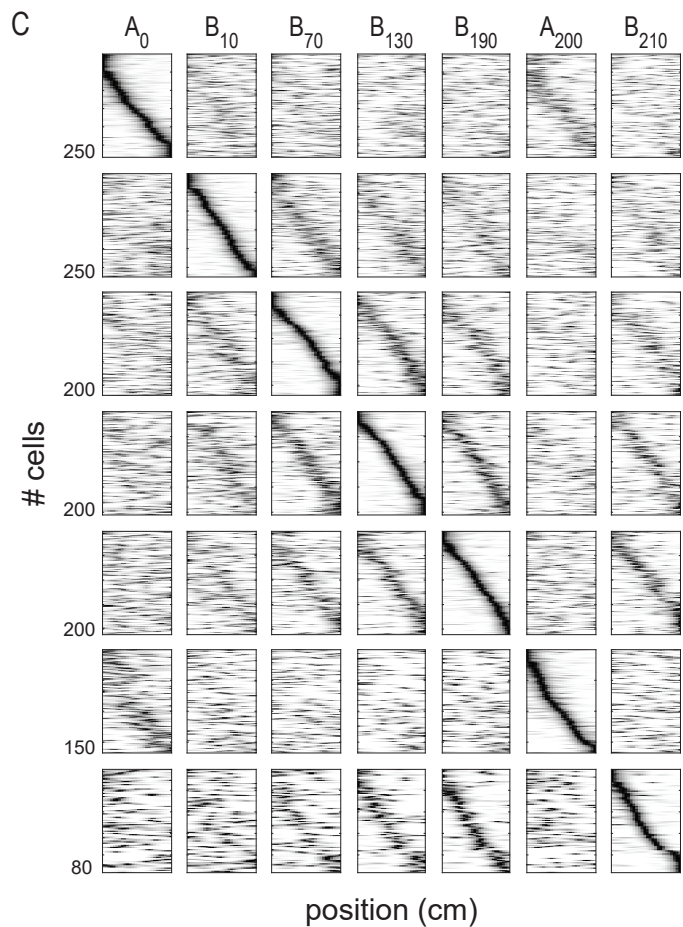

**B**

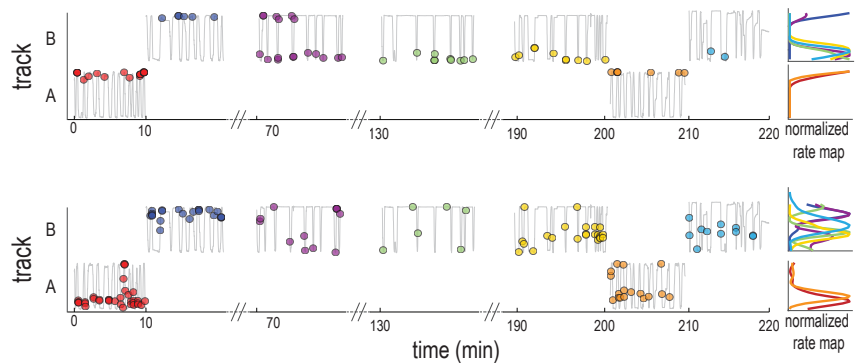

**D**

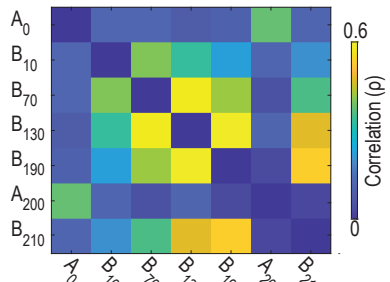

**E**

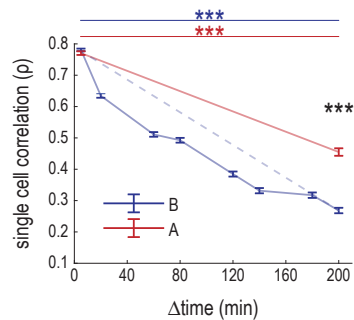

**F**

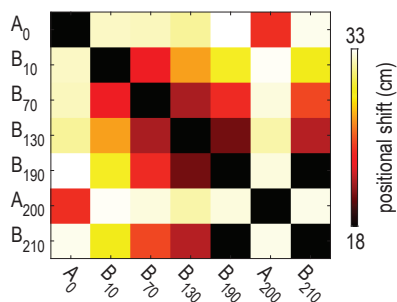

**G**

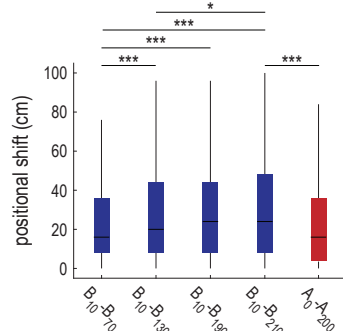

A Figure 3

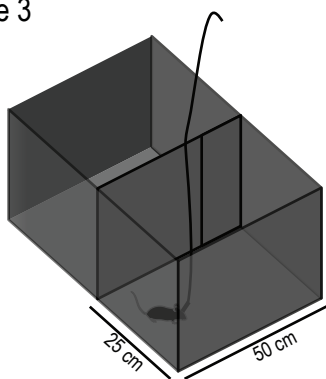

B

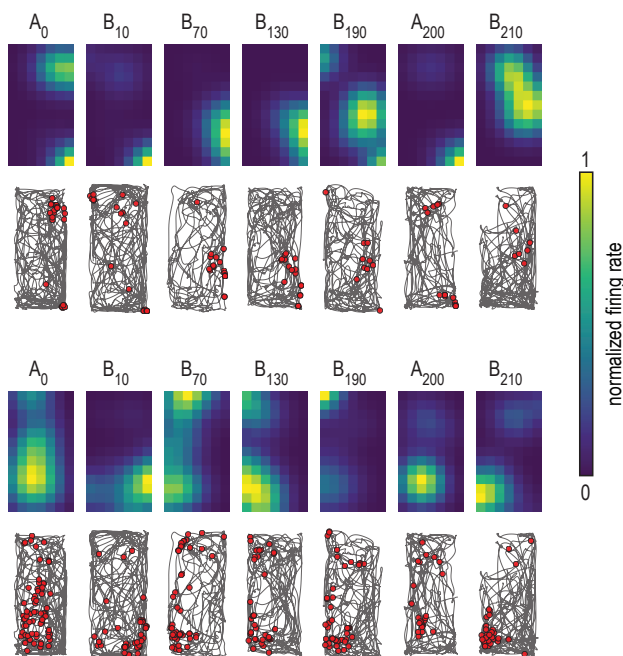

C

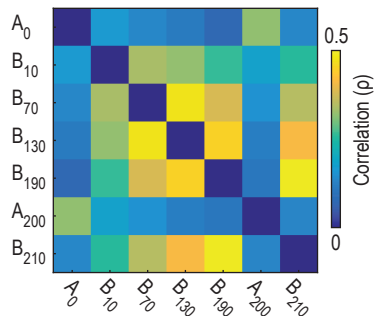

D

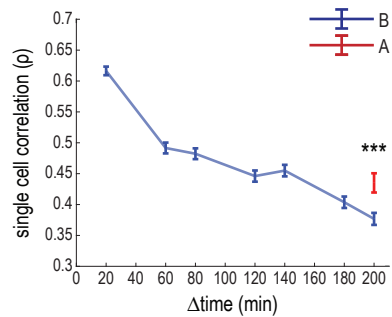

E

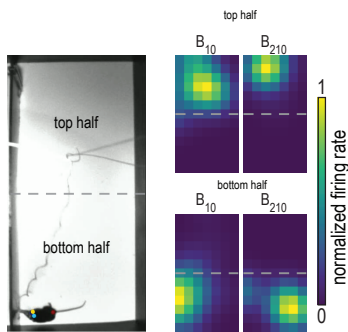

F

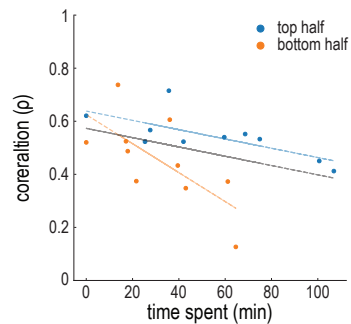

G

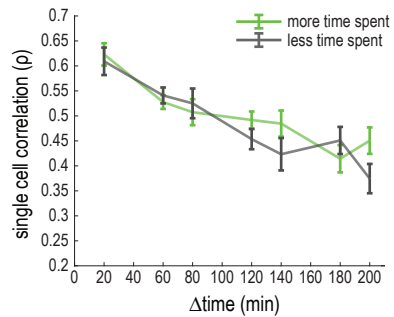

H

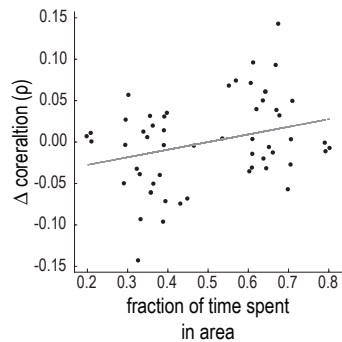

**A Figure 4**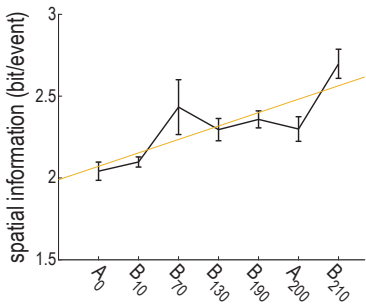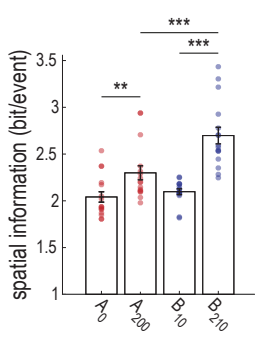**D**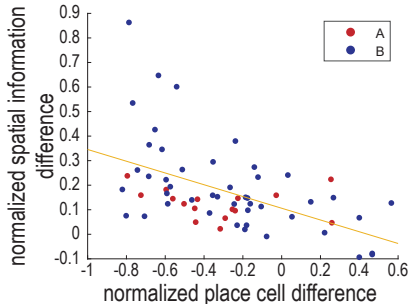**B**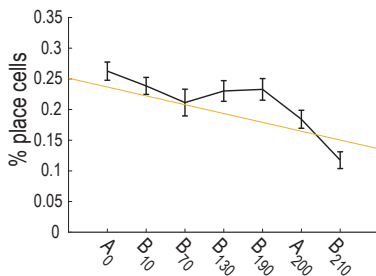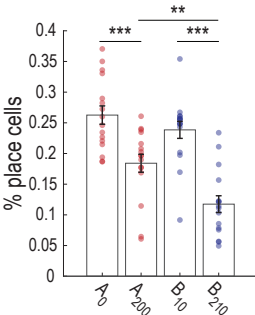**E**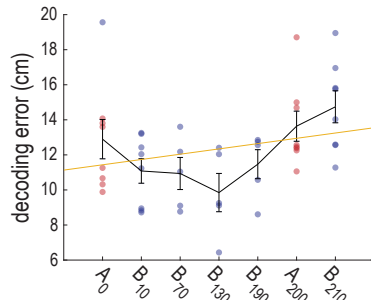**C**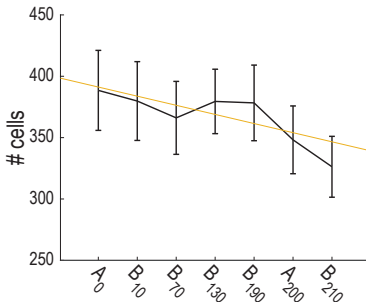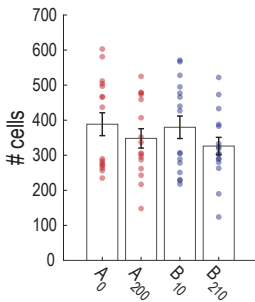**F**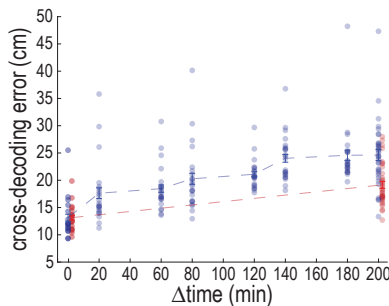

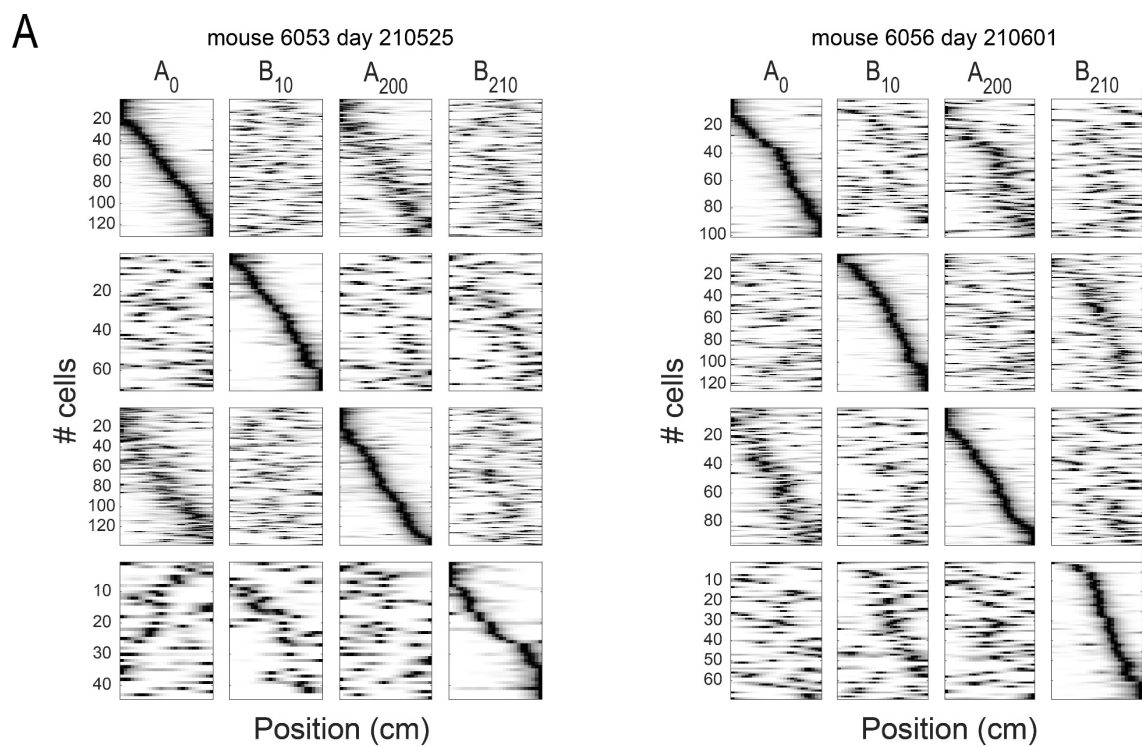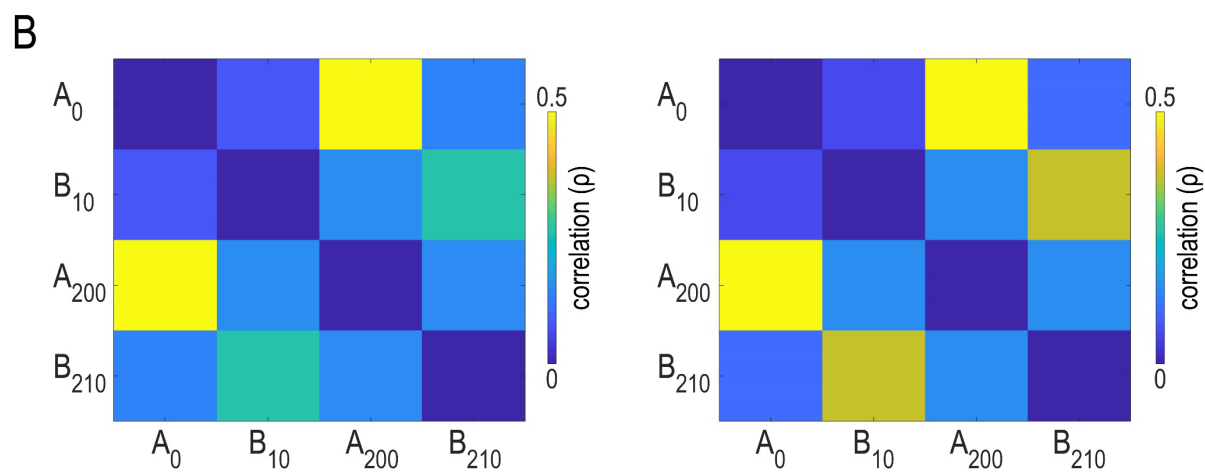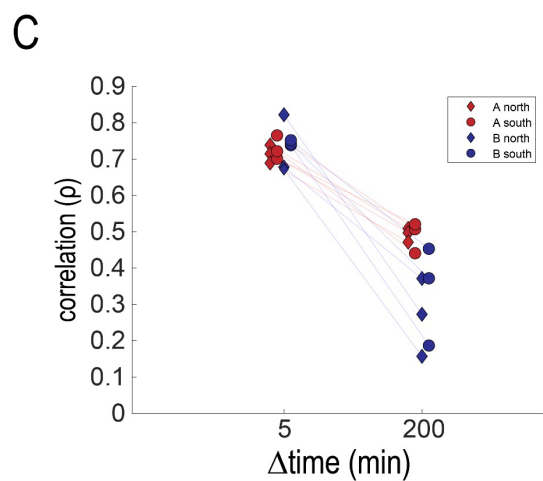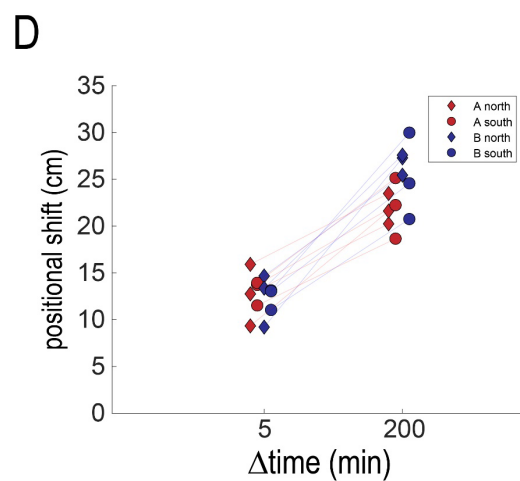

***Supplementary figure 1: Rate maps and correlation examples (related to figure 1).***

- A. *Two examples of rate maps across recordings of two mice. In each row are shown average rate maps for individual cells along the linear track of place cells that were active during that specific session, normalized by peak activity.*
- B. *Pairwise correlations of the individual cells between recordings, for the same mice shown in a.*
- C. *Pairwise single-cell correlations, according to mice and to runs in different directions (north and south).*
- D. *Positional shift of the center of mass of all the place cells, according to mice and to runs in different directions (north and south).*



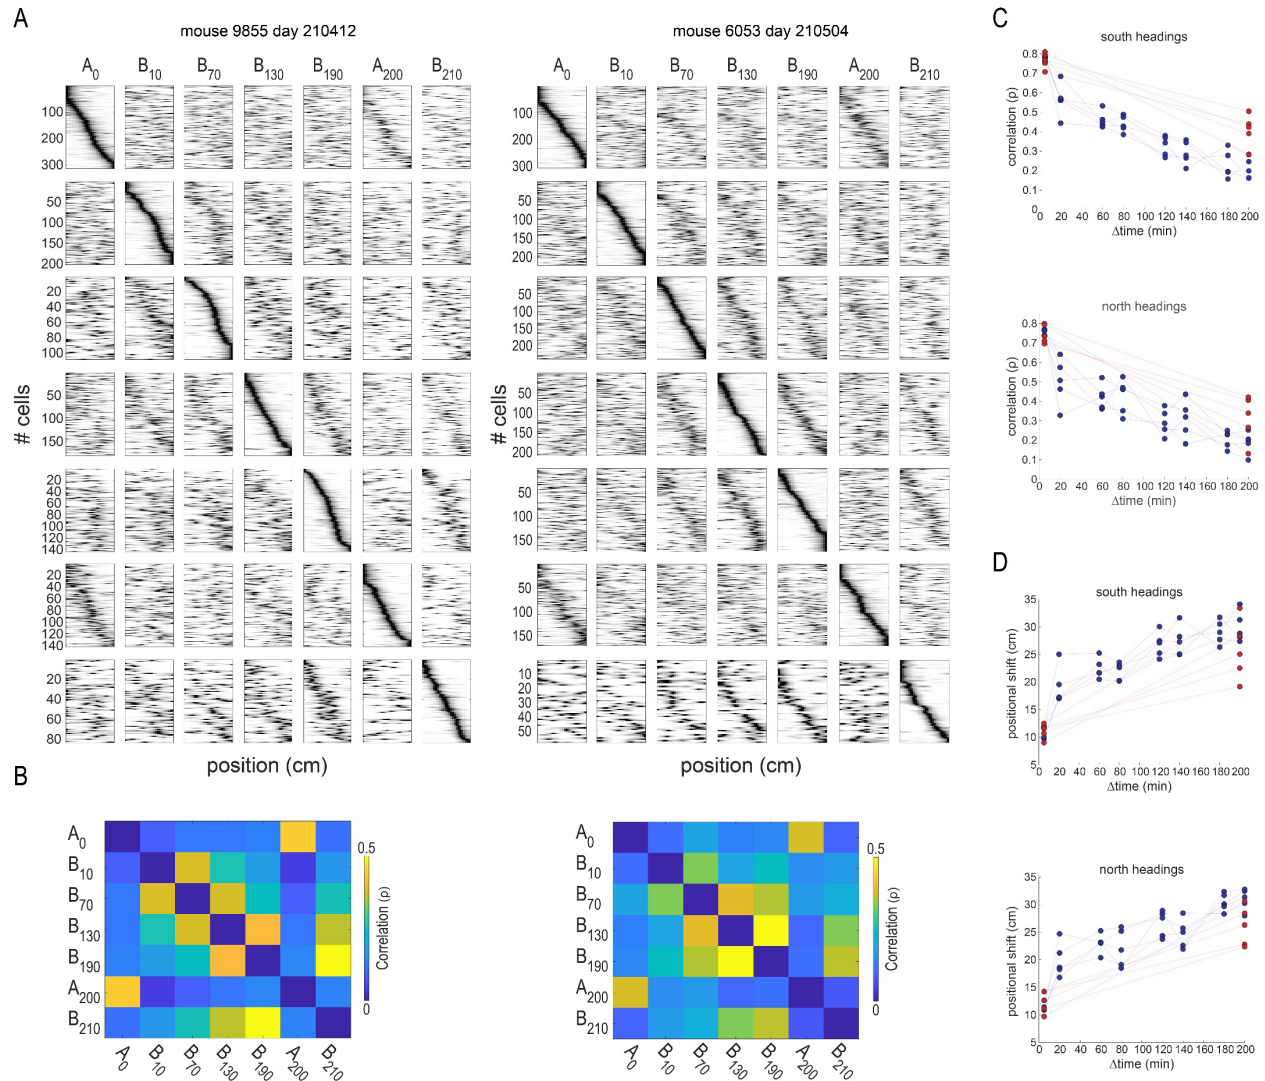

**Supplementary figure 2: Examples of rate maps and correlations of the extended protocol (related to figure 2)**

- A. Two examples of rate maps across recordings of two mice in the extended imaging protocol. In each row are shown average rate maps for individual cells along the linear track of place cells that were active during that specific recording, normalized by peak activity.
- B. Pairwise correlations of individual cells between different imaging sessions for the same mice shown in a.
- C. Pairwise single-cell correlations, as a function of the time difference between sessions, for mice in the south-heading runs (top) and the north-heading runs (bottom).
- Positional shift of the center of mass of all the place cells, for mice in the south-heading runs (top) and the north-heading runs (bottom).

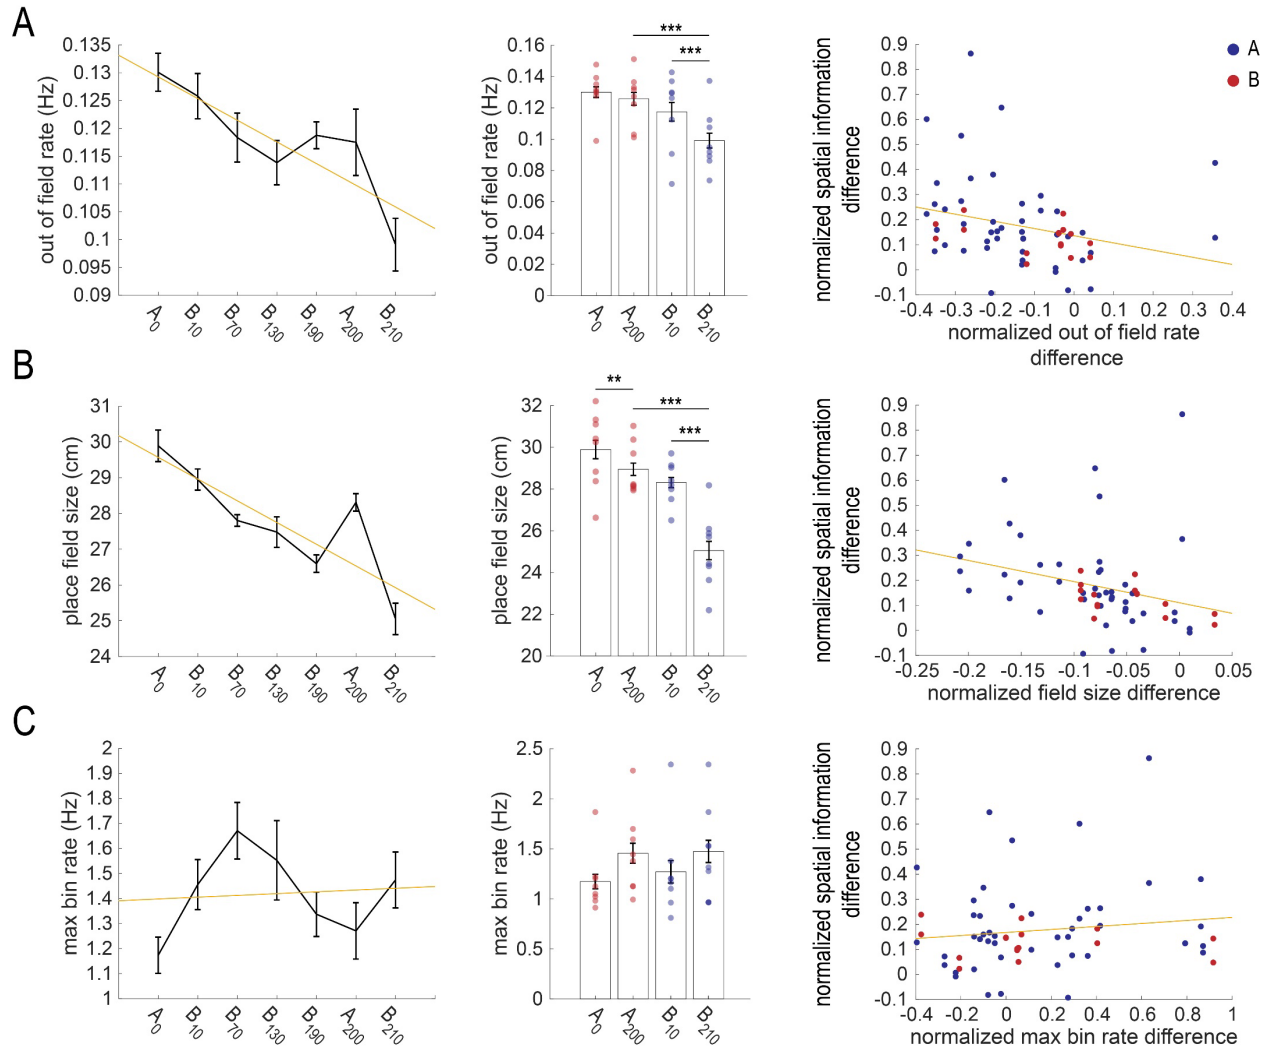

**Supplementary figure 3: The effect of place field size, maximum firing rate of each bin, and out of field firing on spatial information content of place cells (related to figure 4)**

A. The out-of-field event rate ( $n=8$  mice) according to runs north and south along the recordings in both contexts. Left: The fitted regression line between the out-of-field event rate and the time spent in the context was significant ( $R^2=0.196$ ,  $p<0.001$ ). The out-of-field event rate of place cells decreased as the time spent in the context increased ( $\beta=-0.004$ ,  $p<0.001$ ). Middle: bar plot of the out-of-field event rate in the first and last recordings in tracks A and B. The effect of time on the out-of-field event rate was statistically significant,  $F(1, 30) = 22.5$   $p<0.001$  (two-way repeated measures ANOVA). The out-of-field event rate was lower in  $B_{210}$  than in  $B_{10}$  (mean  $\pm$  s.e.m:  $B_{10}=0.12 \pm 0.004$ ;  $B_{210}=0.09 \pm 0.004$ ;  $p<0.001$ ), but not in  $A_{200}$  compared to



$A_0$  (mean $\pm$ s.e.m:  $A_0=0.13\pm 0.003$ ;  $A_{200}=0.11\pm 0.005$ ;  $p=0.237$ ). At the end of the experiment, the spatial information was greater in track B than track A ( $B_{210} - A_{200}$   $p<0.001$ , T-test with Bonferroni correction for multiple comparisons). Right: The difference in spatial information content between the first and last sessions in both tracks, normalized by the values of the first recording (see figure 4d for the equation), plotted as a function of the normalized difference in the out-of-field event rate between the first and last recordings in each track.  $r=-0.26$ ,  $p=0.037$  (Pearson's correlations).

B. The max bin rate for runs north and south along the imaging sessions in both contexts. Left: the fitted regression line between the max bin rate and the time spent in the context was not significant ( $R^2=0.007$ ,  $p=0.58$ ). Middle: bar plot of the max bin rate in the first and last imaging sessions in tracks A and B. The effect of time on the max bin rate was not statistically significant,  $F(1, 30) = 0.576$   $p=0.454$  (two-way repeated measures ANOVA). Right: the difference in spatial information content between the first and last recordings in the two tracks, normalized by the values of the first recording plotted as a function of the normalized difference in the max bin rate between the first and last recordings in each track.  $r=0.13$ ,  $p=0.312$  (Pearson's correlations).

C. Field size for the runs north and south along the imaging sessions in both contexts. Left: The fitted regression line between field size and the time spent in the context was significant ( $R^2=0.403$ ,  $p<0.001$ ). The out-of-field event rate of place cells decreased as the time spent in the context increased ( $\beta=-0.607$ ,  $p<0.001$ ). Middle: bar plot of the field size in the first and last recordings in tracks A and B. The effect of time on the out-of-field event rate was statistically significant,  $F(1, 30) = 103.87$ ,  $p<0.001$  (two-way repeated measures ANOVA). The field size was lower in  $B_{210}$  than in  $B_{10}$  (mean $\pm$ s.e.m:  $B_{10}=28.9\pm 0.3$ ;  $B_{210}=25.05\pm 0.43$ ;  $p<0.001$ ) and in  $A_{200}$  than in  $A_0$  (mean $\pm$ s.e.m:  $A_0=29.9\pm 0.44$ ;  $A_{200}=28.3\pm 0.25$ ;  $p=0.001$ ). At the end of the experiment, the spatial information was greater in track B than track A ( $B_{210} - A_{200}$   $p<0.001$ , T-test with Bonferroni correction for multiple comparisons). Right: The spatial information content difference between the first and last recordings in both tracks, normalized by the values of the first session (see figure 4d for equation), plotted as a function of the normalized

*difference in the out-of-field event rate between the first and last recordings in each track.  $r=-0.288$ ,  $p=0.023$  (Pearson's correlations).*
